# Supplementary material for: Individual Genomic Loci and mRNA Levels of Immune Biomarkers Associated with Pneumonia Susceptibility in Baladi Goats
Source: MDPI journal article supplement (doi:10.3390/vetsci10030185), 2023-03-01
Supplement: s1 [file s1]

**Supplementary:**

**Table S1.** Immune gene oligonucleotide primer sequence used in PCR-DNA sequencing.

| Gene              | Forward                       | Reverse                        | Annealing temperature of PCR (°C) | Length of PCR product (bp) | Source           |
|-------------------|-------------------------------|--------------------------------|-----------------------------------|----------------------------|------------------|
| <i>SLC11A1</i>    | 5'-GTGCCCCGAGTCTGCAGTCCTCA-3' | 5'-AGAGTGGGATTTCGTCCGGCTGAG-3' | 62                                | 523                        | Present research |
| <i>CD-14</i>      | 5'-GTGTGCTTGCCCTGCCTGCTGC-3'  | 5'-AGTGTGCTTGGGCAATGTTCAGC-3'  | 64                                | 538                        | Present research |
| <i>CCL2</i>       | 5'-GCCAGTCCAGAGGCCAACAGCT-3'  | 5'-AGTCACGGAAGATAAACTGAA-3'    | 62                                | 534                        | Present research |
| <i>TLR1</i>       | 5'-ATGCCTGACATCCTCTCACTATC-3' | 5'-AGACAGTTCCAGACTCACTGTG-3'   | 60                                | 471                        | Present research |
| <i>TLR7</i>       | 5'-ATCTTCCTCCCAGCTTACAGCTG-3' | 5'-AGAATTATTTTCACAGGGTGTG-3'   | 60                                | 398                        | Present research |
| <i>TLR8</i>       | 5'-GCTTCTGACCTCCCTTTTCCTGC-3' | 5'-GTGTATCTGAATTGAAGCACCT-3'   | 62                                | 799                        | Present research |
| <i>TLR9</i>       | 5'-ATGGGCCCCTACTGTGCCCCGC-3'  | 5'-TGCTGGTGCGGCTCAGCGACAG-3'   | 62                                | 460                        | Present research |
| <i>β defensin</i> | 5'-CAGCATGAGGCTCCATCACCTG-3'  | 5'-CGAAGGCGGCAGTTTCTGACT-3'    | 62                                | 253                        | Present research |
| <i>SP110</i>      | 5'-TCCTGTTTTGCCCACTGGTATC-3'  | 5'-AGACACGGCAATAGCAGGGTC-3'    | 58                                | 537                        | Present research |
| <i>SPP1</i>       | 5'-ATGAGAATTGCAGTGATTGCT-3'   | 5'-CATTCACTAAGCTGAGAA-3'       | 60                                | 943                        | Present research |
| <i>BP1</i>        | 5'-ATGGCCAGCGGCCCGGCAGT-3'    | 5'-AGGTTGCAGCTTGAGGACACA-3'    | 62                                | 645                        | Present research |
| <i>A2M</i>        | 5'-AACCGCAATACATGGTGCTGGT-3'  | 5'-GGTTTGTCTGTCTGGACAAAGAC-3'  | 58                                | 325                        | Present research |
| <i>ADORA3</i>     | 5'-CTACTCACCTGGGAAGCTTCTC-3'  | 5'-CCTTGACCTTCTCGTCCATGAC-3'   | 64                                | 521                        | Present research |
| <i>CARD15</i>     | 5'-ATGTGCGCACAAGATGCTTTTCA-3' | 5'-GCTGCTGTGTCAGGTCCAGCAC-3'   | 62                                | 394                        | Present research |
| <i>IRF3</i>       | 5'-ACTCCTGGGAAGGATAAGCCCG-3'  | 5'-AGGGCAGAAGACAGTCTGCTGG-3'   | 60                                | 468                        | Present research |

|                                                                                                                                                                                                                                                                                                                                                                                                                                                                                                                                                                                                                                                                                                                                                                           |                         |                          |    |                      |
|---------------------------------------------------------------------------------------------------------------------------------------------------------------------------------------------------------------------------------------------------------------------------------------------------------------------------------------------------------------------------------------------------------------------------------------------------------------------------------------------------------------------------------------------------------------------------------------------------------------------------------------------------------------------------------------------------------------------------------------------------------------------------|-------------------------|--------------------------|----|----------------------|
|                                                                                                                                                                                                                                                                                                                                                                                                                                                                                                                                                                                                                                                                                                                                                                           | 5'-                     | 5'-                      |    |                      |
| <i>SCART1</i>                                                                                                                                                                                                                                                                                                                                                                                                                                                                                                                                                                                                                                                                                                                                                             | CTGAGATCAGGAATGTGAACGG- | ACAGCAGGGACTCGTTGCCCCGC- | 62 | 475 Present research |
|                                                                                                                                                                                                                                                                                                                                                                                                                                                                                                                                                                                                                                                                                                                                                                           | 3'                      | 3'                       |    |                      |
| <hr/> <p><i>SLC11A1</i> = Solute Carrier Family 11 Member 1; <i>CD14</i> = cluster of differentiation 14; <i>CCL2</i>= C-C motif ligand 2; <i>TLR1</i> = Toll-like receptor 1; <i>TLR7</i> = Toll-like receptor 7; <i>TLR8</i> = Toll-like receptor 8; <i>TLR 9</i>= Toll-like receptor 9; <math>\beta</math> <i>defensin</i> = beta defensin; <i>SP110</i> = SP110 Nuclear Body Protein; <i>SPP 1</i>= Secreted Phosphoprotein 1; <i>BP1</i> = bactericidal/permeability-increasing protein; <i>A2M</i> = Alpha-2-Macroglobulin; <i>ADORA3</i> = the adenosine A3 receptor; <i>CARD15</i> = caspase recruitment domain-containing protein 15; <i>IRF3</i> = interferon regulatory factor 3; <i>SCART1</i> = Scavenger Receptor Family Member Expressed On T Cells 1.</p> |                         |                          |    |                      |

**Table S2.** Sequence of the oligonucleotide primers used in real-time PCR for immunological genes under investigation.

| Gene              | Primer                                                              | Product length (bp) | Annealing temperature (°C) | Accession number | Source           |
|-------------------|---------------------------------------------------------------------|---------------------|----------------------------|------------------|------------------|
| <i>SLC11A1</i>    | F5'- GGACATCCGAGAAGCCAACA -3'<br>R5'- TGGGAAAGATCGTCGCGTAG -3'      | 182                 | 60                         | KX151137.1       | Present research |
| <i>CD-14</i>      | F5'- CAGCTGCAACAAGCTAAGCA -3'<br>R5'- CGGTCTGGAATCATACGGGA -3'      | 144                 | 59                         | DQ457090.1       | Present research |
| <i>CCL2</i>       | F5'- ACATTCTGCTTCGGCACTCA -3'<br>R5'- AGACCTTCATGTTGCAGCGA -3'      | 200                 | 60                         | XM_005693218.3   | Present research |
| <i>TLR1</i>       | F5'- ATGCCTGACATCCTCTCACT -3'<br>R5'- GAGGTTTCAGAGTAGGGTGGC -3'     | 162                 | 58                         | NM_001285605.1   | Present research |
| <i>TLR7</i>       | F5'- CTTCTCTGTGTCTTCCAGGGTC -3'<br>R5'- CTACCGTTTCCTCACCTTGC -3'    | 194                 | 59                         | NM_001285543.2   | Present research |
| <i>TLR8</i>       | F5'- CCCGAAGCTATCCTTGCGAT -3'<br>R5'- CCACTCTGGGACTTGGCATT -3'      | 217                 | 60                         | GU936189.1       | Present research |
| <i>TLR9</i>       | F5'- TTCACCTGGACCTGTCACG -3'<br>R5'- ATTAACCGCCTGGGAGATGC -3'       | 117                 | 60                         | EU747825.1       | Present research |
| <i>β defensin</i> | F5'- CTTCTGGTCTGTCTGCTG -3'<br>R5'- GTTTCTAGGGCACCTGTCCG -3'        | 106                 | 62                         | DQ532360.1       | Present research |
| <i>SP110</i>      | F5'- TGCCCCACGATTCTTTACGA -3'<br>R5'- CGGGCATAAATGAGCGAGGA -3'      | 108                 | 62                         | XM_018058530.1   | Present research |
| <i>SPP1</i>       | F5'- CGCCCTTCCAGTTAAACCGA -3'<br>R5'- GCTTCTGAGATGGGTCAGGC -3'      | 110                 | 62                         | NM_001285667.1   | Present research |
| <i>BP1</i>        | F5'- TTCAGCATGGTTATTCGAGGA -3'<br>R5'- TAGAGATGCCCTCCACACTCA -3'    | 178                 | 58                         | NM_001314172.1   | Present research |
| <i>A2M</i>        | F5'- TGCAGTTTGCCCTCACGAT -3'<br>R5'- CACCGTCTCATTACAGGTGGC -3'      | 192                 | 62                         | XM_018048527.1   | Present research |
| <i>ADORA3</i>     | F5'- TGAGGCTCTTCATTCTGCTCT -3'<br>R5'- CCAGTACTTGGGGTGGTCTT -3'     | 143                 | 58                         | XM_013962543.2   | Present research |
| <i>CARD15</i>     | F5'- TCCTGAGCACCTACGATGGA -3'<br>R5'- AAATGGTCACGGGTGCTGAA -3'      | 157                 | 60                         | NM_001314291.1   | Present research |
| <i>IRF3</i>       | F5'- ACATGACTCCCCGAGCAACTG -3'<br>R5'- TGGCAGCCTTCCACAATGAT -3'     | 103                 | 60                         | JQ308793.1       | Present research |
| <i>SCART1</i>     | F5'- CCACTGGGACTTGGCAGAC -3'<br>R5'- TGAGATCAGGAATGTGAACGGG -3'     | 151                 | 62                         | XR_001917340.1   | Present research |
| <i>β. actin</i>   | F5'- GCCCCTACAGGTCATGTACTTC -3'<br>R5'- GCACAGCCTGGATGGCCACATAC -3' | 113                 | 60                         | AF481159.1       | Present research |

*SLC11A1* = Solute Carrier Family 11 Member 1; *CD14* = cluster of differentiation 14; *CCL 2*= C-C motif ligand 2; *TLR1* = Toll-like receptor 1; *TLR7* = Toll-like receptor 7; *TLR8* = Toll-like receptor 8; *TLR9* = Toll-like receptor 9; *β defensin* = beta defensin; *SP110*= SP110 Nuclear Body Protein; *SPP1* = Secreted Phosphoprotein 1; *BP1* = bactericidal/permeability-increasing protein; *A2M* = Alpha-2-Macroglobulin; *ADORA3* = the adenosine A3 receptor; *CARD15* = caspase recruitment domain-containing protein 15; *IRF3* = interferon regulatory factor 3; *SCART1* = Scavenger Receptor Family Member Expressed On T Cells 1.

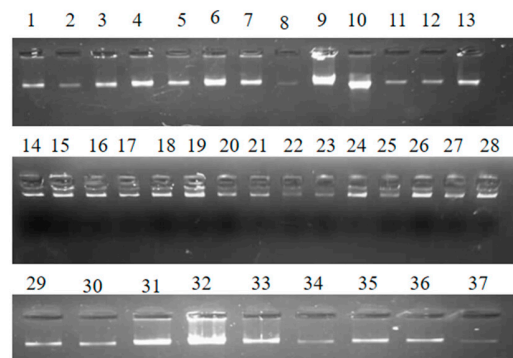

Figure S1: Representative gel electrophoresis for extracted DNA samples from the investigated does. Lanes from 1 to 37 are positive DNA samples.

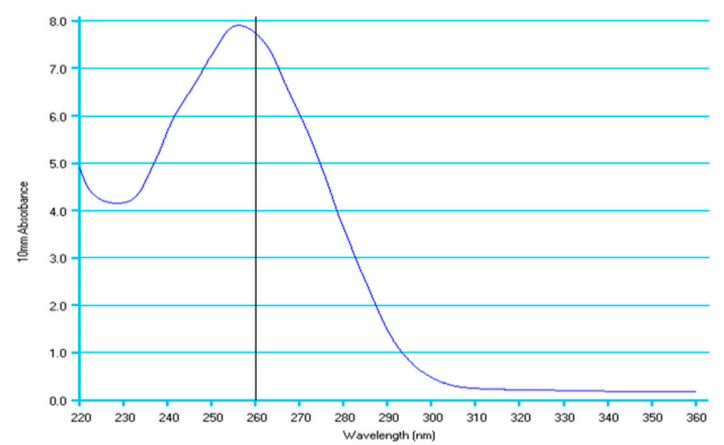

Figure S2: Nanodrop curve showing concentration of representative DNA extracted from the investigated does.

```

KKX151137.1      GTGCCCCGAGTCTGCAGTCTCATGTCTCAGGTGACACGGGTACCCCAAACCAGGGAGGGACC 60
H                GTGCCCCGAGTCTGCAGTCTCATGTCTCAGGTGACACGGGTACCCCAAACCAGGGAGGGACC 60
P                GTGCCCCGAGTCTGCAGTCTCATGTCTGGTGACACGGGTACCCCAAACCAGGGAGGGACC 60
                *****

KKX151137.1      AGATATGGCTCCATCTCCAGCCCCACCCAGTCCAGGGCCACAGCAAGCACCTCCCGGAGGG 120
H                AGATATGGCTCCATCTCCAGCCCCACCCAGTCCAGGGCCACAGCAAGCACCTCCCGGAGGG 120
P                AGATATGGCTCCATCTCCAGCCCCACCCAGTCCAGGGCCACAGCAAGCACCTCCCGGAGGG 120
                *****

KKX151137.1      ACCTACCTAAGTGAGAAGATCCCATTCGGGATACAGAATCGGGTGCAATTCAGCCTGCGG 180
H                ACCTACCTAAGTGAGAAGATCCCATTCGGGATACAGAATCGGGTGCAATTCAGCCTGCGG 180
P                ACCTACCTAAGTGAGAAGATCCCATTCGGGATACAGAATCGGGTGCAATTCAGCCTGCGG 180
                *****

KKX151137.1      AAGCTGTGGGCCTTCACAGGGCCTGGATTCTCATGAGCATAGCATTCTGGACCCAGGA 240
H                AAGCTGTGGGCCTTCACAGGGCCTGGATTCTCATGAGCATAGCATTCTGGACCCAGGA 240
P                AAGCTGTGGGCCTTCACAGGGCCTGGATTCTCATGAGCATAGCATTCTGGACCCAGGA 240
                *****

KKX151137.1      AACATCGAGTCGGATCTTCAGGCTGGGGCTGTGGCTGGATTCAAACTGCTCTGGGTGCTG 300
H                AACATCGAGTCGGATCTTCAGGCTGGGGCTGTGGCTGGATTCAAACTGCTCTGGGTGCTG 300
P                AACATCGAGTCGGATCTTCAGGCTGGGGCTGTGGCTGGATTCAAACTGCTCTGGGTGCTG 300
                *****

KKX151137.1      CTGTGGGCCACAGTGTTGGGCTTGCTCTGCCAGCGACTGGCTGCCCGGCTGGGCGTGCTG 360
H                CTGTGGGCCACAGTGTTGGGCTTGCTCTGCCAGCGACTGGCTGCCCGGCTGGGCGTGCTG 360
P                CTGTGGGCCACAGTGTTGGGCTTGCTCTGCCAGCGACTGGCTGCCCGGCTGGGCGTGCTG 360
                *****

KKX151137.1      ACAGGCAAGGACTTGGGAGAGGTCTGCCATCTCTACTACCCTAAGGTGCCCGCACTCTC 420
H                ACAGGCAAGGACTTGGGAGAGGTCTGCCATCTCTACTACCCTAAGGTGCCCGCACTCTC 420
P                ACAGGCAAGGACTTGGGAGAGGTCTGCCATCTCTACTACCCTAAGGTGCCCGCACTCTC 420
                *****

KKX151137.1      CTCTGGCTGACCATCGAGCTAGCCATCGTGGGCTCGGACATGCAGGAAGTCATTGGCACA 480
H                CTCTGGCTGACCATCGAGCTAGCCATCGTGGGCTCGGACATGCAGGAAGTCATTGGCACA 480
P                CTCTGGCTGACCATCGAGCTAGCCATCGTGGGCTCGGACATGCAGGAAGTCATTGGCACA 480
                *****

KKX151137.1      GCTATTGCATTCACTCTGCTCTCAGCCGGACGAATCCCACTCT 523
H                GCTATTGCATTCACTCTGCTCTCAGCCGGACGAATCCCACTCT 523
P                GCTATTGCATTCACTCTGCTCTCAGCCGGACGAATCCCACTCT 523
                *****

```

Figure S3: Comparison of healthy and pneumonia-affected Baladi goats using GenBank-sourced reference sequence gb|KX151137.1| and the *SLC11A1* gene (523-bp) demonstrating DNA sequence alignment.

|                |                                                                 |     |
|----------------|-----------------------------------------------------------------|-----|
| NM_001361647.1 | GTGTGCTTGCCCTGCCTGCTGCTGCTGCTGCTGCCGCCACTGCTGCGTGTGTCTGCGGAC    | 60  |
| H              | GTGTGCTTGCCCTGCCTGCTGCTGCTGCTGCTGCTGCCGCCACTGCTGCGTGTGTCTGCGGAC | 60  |
| P              | GTGTGCTTGCCCTGCCTGCTGCTGCTGCTGCTGCCGCCACTGCTGCGTGTGTCTGCGGAC    | 60  |
|                | *****                                                           |     |
| NM_001361647.1 | ACGACAGAGCCCTGCGAGCTGGACGACGACGATTTCCGCTGTGTCTGCAACTTCACGGAT    | 120 |
| H              | ACGACAGAGCCCTGCGAGCTGGACGACGACGATTTCCGCTGTGTCTGCAACTTCACGGAT    | 120 |
| P              | ACGACAGAGCCCTGCGAGCTGGACGACGACGATTTCCGCTGTGTCTGCAACTTCACGGAT    | 120 |
|                | *****                                                           |     |
| NM_001361647.1 | CCGAAGCCTGACTGGTCTAGCGCCGTTTCAGTGTATGGTTGCCGTCGAGGTGGAGATCCGT   | 180 |
| H              | CCGAAGCCTGACTGGTCTAGCGCCGTTTCAGTGTATGGTTGCCGTCGAGGTGGAGATCCGT   | 180 |
| P              | CCGAAGCCTGACTGGTCTAGCGCCGTTTCAGTGTATGGTTGCCGTCGAGGTGGAGATCCGT   | 180 |
|                | *****                                                           |     |
| NM_001361647.1 | GGCGGCGGCCACAGCCTGGACCAGTTTCTCAAGGGAGCCAAACACCGACCCGAAGCAGTAT   | 240 |
| H              | GGCGGCGGCCACAGCCTGGACCAGTTTCTCAAGGGAGCCAAACACCGACCCGAAGCAGTAT   | 240 |
| P              | GGCGGCGGCCACAGCCTGGACCAGTTTCTCAAGGGAGCCAAACACCGACCCGAAGCAGTAT   | 240 |
|                | *****                                                           |     |
| NM_001361647.1 | GCTGACACAATCAAGGCTCTGCGCGTTTCGGCGACTCAAGCTGGGCGCTGCACAGGTTCCCT  | 300 |
| H              | GCTGACACAATCAAGGCTCTGCGCGTTTCGGCGACTCAAGCTGGGCGCTGCACAGGTTCCCT  | 300 |
| P              | GCTGACACAATCAAGGCTCTGCGCGTTTCGGCGACTCAAGCTGGGCGCTGCACAGGTTCCCT  | 300 |
|                | *****                                                           |     |
| NM_001361647.1 | GCTCAGCTTCTGGTCGCCGTTCTGCGCGCGCTCGGGTACTCTCGTCTCAAGGAACCTGACG   | 360 |
| H              | GCTCAGCTTCTGGTCGCCGTTCTGCGCGCGCTCGGGTACTCTCGTCTCAAGGAACCTGACG   | 360 |
| P              | GCTCAGCTTCTGGTCGCCGTTCTGCGCGCGCTCGGGTACTCTCGTCTCAAGGAACCTGACG   | 360 |
|                | *****                                                           |     |
| NM_001361647.1 | CTTGAGGACCTGGAGGTAAGTGGCCCAACGCCCCCGCGCCTCTGGAAGCCACTGGGCCT     | 420 |
| H              | CTTGAGGACCTGGAGGTAAGTGGCCCAACGCCCCCGCGCCTCTGGAAGCCACTGGGCCT     | 420 |
| P              | CTTGAGGACCTGGAGGTAAGTGGCCCAACGCCCCCGCGCCTCTGGAAGCCACTGGGCCT     | 420 |
|                | *****                                                           |     |
| NM_001361647.1 | GCGCTCACCACCCCTCAGTCTCCGTAACGTGTGCTGGGCAACAGGAGGTGCCTGGCTCGGC   | 480 |
| H              | GCGCTCACCACCCCTCAGTCTCCGTAACGTGTGCTGGGCAACAGGAGGTGCCTGGCTCGGC   | 480 |
| P              | GCGCTCACCACCCCTCAGTCTCCGTAACGTGTGCTGGGCAACAGGAGGTGCCTGGCTCGGC   | 480 |
|                | *****                                                           |     |
| NM_001361647.1 | GAACTGCAGCAGTGGCTCAAGCCTGGGCTCAGGGCGCTGAACATTGCCCAAGCACACT      | 538 |
| H              | GAACTGCAGCAGTGGCTCAAGCCTGGGCTCAGGGCGCTGAACATTGCCCAAGCACACT      | 538 |
| P              | GAACTGCAGCAGTGGCTCAAGCCTGGGCTCAGGGCGCTGAACATTGCCCAAGCACACT      | 538 |
|                | *****                                                           |     |

Figure S4: Comparison of healthy and pneumonia-affected Baladi goats using GenBank-sourced reference sequence gb|NM\_001361647.1| and the *CD14* gene (538-bp) demonstrating DNA sequence alignment.

|                |                                                              |     |
|----------------|--------------------------------------------------------------|-----|
| XM_004012471.4 | GCCAGTCCAGAGGCCAACAGCTCCACGCTGAAGCTTGAATCCTCTCGCTGCAACATGAA  | 60  |
| H              | GCCAGTCCAGAGGCCAACAGCTCCACGCTGAAGCTTGAATCCTCTCGCTGCAACATGAA  | 60  |
| P              | GCCAGTCCAGAGGCCAACAGCTCCACGCTGAAGCTTGAATCCTCTCGCTGCAACATGAA  | 60  |
| XM_004012471.4 | GGTCTCCGCTGCTCTCCTCTGCTGCTACTCACAGTAGCTGCCTTCAGCACCGAGGTGCT  | 120 |
| H              | GGTCTCCGCTGCTCTCCTCTGCTGCTACTCACAGTAGCTGCCTTCAGCACCGAGGTGCT  | 120 |
| P              | GGTCTCCGCTGCTCTCCTCTGCTGCTACTCACAGTAGCTGCCTTCAGCACCGAGGTGCT  | 120 |
| XM_004012471.4 | CGCTCAGCCAGATGCAATTAACGCCAAATCGCCTGCTGCTATAAATTCATAAGAAGAT   | 180 |
| H              | CGCTCAGCCAGATGCAATTAACGCCAAATCGCCTGCTGCTATAAATTCATAAGAAGAT   | 180 |
| P              | CGCTCAGCCAGATGCAATTAACGCCAAATCGCCTGCTGCTATAAATTCATAAGAAGAT   | 180 |
| XM_004012471.4 | CCCCATACAGAGGCTGACAACTACAGAAGAGTCACCACCAGCAAGTGTCCCAAGAAGC   | 240 |
| H              | CCCCATACAGAGGCTGACAACTACAGAAGAGTCACCACCAGCAAGTGTCCCAAGAAGC   | 240 |
| P              | CCCCATACAGAGGCTGACAACTACAGAAGAGTCACCACCAGCAAGTGTCCCAAGAAGC   | 240 |
| XM_004012471.4 | TGTGATTTTCAAGACCATCCTAGGCAAGAGTTTTGTGCAGACCCCAACCTGAAATGGGT  | 300 |
| H              | TGTGATTTTCAAGACCATCCTAGGCAAGAGTTTTGTGCAGACCCCAACCTGAAATGGGT  | 300 |
| P              | TGTGATTTTCAAGACCATCCTAGGCAAGAGTTTTGTGCAGACCCCAACCTGAAATGGGT  | 300 |
| XM_004012471.4 | CCAGGACGCCATAAACCATCTCAACAAGAAAAACCAACTCCGAAGCCTTGAGCACTCAC  | 360 |
| H              | CCAGGACGCCATAAACCATCTCAACAAGAAAAACCAACTCCGAAGCCTTGAGCACTCAC  | 360 |
| P              | CCAGGACGCCATAAACCATCTCAACAAGAAAAACCAACTCCGAAGCCTTGAGCACTCAC  | 360 |
| XM_004012471.4 | TCCACAACCCAGAATCTAAAGACAATCTGTGTTCTTCTGGCTTCCCCTAACTGCCCTCT  | 420 |
| H              | TCCACAACCCAGAATCTAAAGACAATCTGTGTTCTTCTGGCTTCCCCTAACTGCCCTCT  | 420 |
| P              | TCCACAACCCAGAATCTAAAGACAATCTGTGTTCTTCTGGCTTCCCCTAACTGCCCTCT  | 420 |
| XM_004012471.4 | GATATTACCTTATTATAATTTTGAAGAGTATAACTTTATTGATGTGAACATGATGCCTTA | 480 |
| H              | GATATTACCTTATTATAATTTTGAAGAGTATAACTTTATTGATGTGAACATGATGCCTTA | 480 |
| P              | GATATTACCTTATTATAATTTTGAAGAGTATAACTTTATTGATGTGAACATGATGCCTCA | 480 |
| XM_004012471.4 | AGTAATGTTAATATTATTTAAGTTATTGATGCTTTCAGTTTATCTTCCGTGACT       | 534 |
| H              | AGTAATGTTAATATTATTTAAGTTATTGATGCTTTCAGTTTATCTTCCGTGACT       | 534 |
| P              | AGTAATGTTAATATTATTTAAGTTATTGATGCTTTCAGTTTATCTTCCGTGACT       | 534 |

Figure S5: Comparison of healthy and pneumonia-affected Baladi goats using GenBank-sourced reference sequence gb|XM\_004012471.4| and the *CCL2* gene (534-bp) demonstrating DNA sequence alignment.



```

KJ210567.1      ATGCCTGACATCCTCTCACTATCAAAGCTGAAAAATTTTGATAATTTCTCATAATAGAATC 60
H              ATGCCTGACATCCTCTCACTATCAAAGCTGAAAAATTTTGATAATTTCTCATAATAGAATC 60
P              ATGCCTGACATCCTCTCACTATCAAAGCTGAAAAATTTTGATAATTTCTCATAATAGAATC 60
                *****

KJ210567.1      CAGTATCTTGACGGTGTTTTTAAATTCAACCACAGACTGGAATACTTGGATTGTGCCAC 120
H              CAGTATCTTGACGGTGTTTTTAAATTCAACCACAGACTGGAATACTTGGATTGTGCCAC 120
P              CAGTATCTTGACGGTGTTTTTAAATTCAACCACAGACTGGAATACTTGGATTGTGCCAC 120
                *****

KJ210567.1      AACAAATTTGGAGAAGATTTCTTGCCACCTACTCTGAACCTCAAGCACTTAGACCTCTCA 180
H              AACAAATTTGGAGAAGATTTCTTGCCACCTACTCTGAACCTCAAGCACTTAGACCTCTCA 180
P              AACAAATTTGGAGAAGATTTCTTGCCACCTACTCTGAACCTCAAGCACTTAGACCTCTCA 180
                *****

KJ210567.1      TTTAATGCATTTGATGCCCTGCCCATATGCCAAGAGTTTGGCAACATGTCTCAACTAGAA 240
H              TTTAATGCATTTGATGCCCTGCCCATATGCCAAGAGTTTGGCAACATGTCTCAACTAGAA 240
P              TTTAATGCATTTGATGCCCTGCCCATATGCCAAGAGTTTGGCAACATGTCTCAACTAGAA 240
                *****

KJ210567.1      TTTCTGGGGTTGAGTGCCACACAGTTACAAAAATCCAGTGTGCAGTCAATCACTCGTTTG 300
H              TTTCTGGGGTTGAGTGCCACACAGTTACAAAAATCCAGTGTGCAGTCAATCACTCGTTTG 300
P              TTTCTGGGGTTGAGTGCCACACAGTTACAAAAATCCAGTGTGCAGTCAATCACTCGTTTG 300
                *****

KJ210567.1      CACATCAGCAAGGTTTTATTGGTCTTAGGAGATACTTATGGGGAAGAGAAGATGCTGAG 360
H              CACATCAGCAAGGTTTTATTGGTCTTAGGAGATACTTATGGGGAAGAGAAGATGCTGAG 360
P              CACATCAGCAAGGTTTTATTGGTCTTAGGAGATACTTATGGGGAAGAGAAGATGCTGAG 360
                *****

KJ210567.1      AGCCTTCAAGACCTTAAGACACAGAGCCTGCACGTTGTTTTCCCCACAGGAAAGGAATTC 420
H              AGCCTTCAAGACCTTAAGACACAGAGCCTGCACGTTGTTTTCCCCACAGGAAAGGAATTC 420
P              AGCCTTCAAGACCTTAAGACACAGAGCCTGCACGTTGTTTTCCCCACAGGAAAGGAATTC 420
                *****

KJ210567.1      CATTTTAATTTGGACGTGTGAGTCAGCAGCACCACAGTGAGTCTGGAACGTGTCT 471
H              CATTTTAATTTGGACGTGTGAGTCAGCAGCACCACAGTGAGTCTGGAACGTGTCT 471
P              CATTTTAATTTGGACGTGTGAGTCAGCAGCACCACAGTGAGTCTGGAACGTGTCT 471
                *****

```

Figure S6: Comparison of healthy and pneumonia-affected Baladi goats using GenBank-sourced reference sequence gb|KJ210567.1| and the *TLR1* gene (471-bp) demonstrating DNA sequence alignment.

```

GU289401.1  ATCTTCCTCCCAGCTTACAGCTGCTGAGCCTGGAGGCCAACAAACATCTTCTTGATCATGA 60
H           ATCTTCCTCCCAGCTTACAGCTGCTGAGCCTGGAGGCCAACAAACATCTTCTTGATCATGA 60
P           ATCTTCCTCCCAGCTTACAGCTGCTGAGCCTGGAGGCCAACAAACATCTTCTTGATCATGA 60
*****
GU289401.1  AGGAGAATCTAACAGAACTGGCCAACTAGAAATACTCTACCTGGGCCAAAAGTGTACT 120
H           AGGAGAATCTAACAGAACTGGCCAACTAGAAATACTCTACCTGGGCCAAAAGTGTACT 120
P           AGGAGAATCTAACAGAACTGGCCAACTAGAAATACTCTACCTGGGCCAAAAGTGTACT 120
*****
GU289401.1  ATCGTAACCCCTTGTAATGTTTCATTACTATCGAAAAAGATGCTTTCCCTAAATATGAGAA 180
H           ATCGTAACCCCTTGTAATGTTTCATTACTATCGAAAAAGATGCTTTCCCTAAATATGAGAA 180
P           ATCGTAACCCCTTGTAATGTTTCATTACTATCGAAAAAGATGCTTTCCCTAAATATGAGAA 180
*****
GU289401.1  ATTTAAATGCTCTCCCTAAAAGATAACAATATCTCAGCTGTCCCCACTGTTTGGCCAT 240
H           ATTTAAATGCTCTCCCTAAAAGATAACAATATCTCAGCTGTCCCCACTGTTTGGCCAT 240
P           ATTTAAATGCTCTCCCTAAAAGATAACAATATCTCAGCTGTCCCCACTGTTTGGCCAT 240
*****
GU289401.1  CTAGTTTGACAGAACTCTATCTTTACAATAACATCATTACAAAATCCAGAAGATGATT 300
H           CTAGTTTGACAGAACTCTATCTTTACAATAACATCATTACAAAATCCAGAAGATGATT 300
P           CTAGTTTGACAGAACTCTATCTTTACAATAACATCATTACAAAATCCAGAAGATGATT 300
*****
GU289401.1  TTAATAACCTCAGTCAACTACAAGTTCTTGATCTGAGTGGAAATTGCCCTCGTTGTTATA 360
H           TTAATAACCTCAGTCAACTACAAGTTCTTGATCTGAGTGGAAATTGCCCTCGTTGTTATA 360
P           TTAATAACCTCAGTCAACTACAAGTTCTTGATCTGAGTGGAAATTGCCCTCGTTGTTATA 360
*****
GU289401.1  ATGTTCCATTTCCTTGACACCCTGTGAAAATAATTCT 398
H           ATGTTCCATTTCCTTGACACCCTGTGAAAATAATTCT 398
P           ATGTTCCATTTCCTTGACACCCTGTGAAAATAATTCT 398
*****

```

Figure S7: Comparison of healthy and pneumonia-affected Baladi goats using GenBank-sourced reference sequence gb|GU289401.1| and the *TLR7* gene (398-bp) demonstrating DNA sequence alignment.

```

GU936189.1      GCTTCTGACCTCCCTTTTCTGCTCATCTCCGATTCTGTGAGTTCTTCACTGAAGCCAG 60
H               GCTTCTGACCTCCCTTTTCTGCTCATCTCCGATTCTGTGAGTTCTTCACTGAAGCCAG 60
P               GCTTCTGACCTCCCTTTTCTGCTCATCTCCGATTCTGTGAGTTCTTCACTGAAGCCAG 60
                *****

GU936189.1      TTATCCCGAAGCTATCCTTGCGATGTGAAAAACAATAATGGCTCTTTTATTGCAGAATG 120
H               TTATCCCGAAGCTATCCTTGCGATGTGAAAAACAATAATGGCTCTTTTATTGCAGAATG 120
P               TTATCCCGAAGCTATCCTTGCGATGTGAAAAACAATAATGGCTCTTTTATTGCAGAATG 120
                *****

GU936189.1      TAACAGTCGTGATTACAGGAAGTACCCCAAACAGTGGACAAAGCTGTGACAGAAGTAGA 180
H               TAACAGTCGTGATTACAGGAAGTACCCCAAACAGTGGACAAAGCTGTGACAGAAGTAGA 180
P               TAACAGTCGTGATTACAGGAAGTACCCCAAACAGTGGACAAAGCTGTGACAGAAGTAGA 180
                *****

GU936189.1      CCTGTCTGATAATTTTCATCACAGTATAACGAATGAATCCTTTCAAGGGCTGCAAAATCT 240
H               CCTGTCTGATAATTTTCATCACAGTATAACGAATGAATCCTTTCAAGGGCTGCAAAATCT 240
P               CCTGTCTGATAATTTTCATCACAGTATAACGAATGAATCCTTTCAAGGGCTGCAAAATCT 240
                *****

GU936189.1      GACTAAAATCAACCTGAACCATATGCCCAGTCCCAGAGTGAAAATCCTGCTGTAAAGAA 300
H               GACTAAAATCAACCTGAACCATATGCCCAGTCCCAGAGTGAAAATCCTGCTGTAAAGAA 300
P               GACTAAAATCAACCTGAACCATATGCCCAGTCCCAGAGTGAAAATCCTGCTGTAAAGAA 300
                *****

GU936189.1      AGCTATGACTATTACAGACGGGGCATTCTCAACCTCAAACACCTAAGGGAGTTGCTGCT 360
H               AGCTATGACTATTACAGACGGGGCATTCTCAACCTCAAACACCTAAGGGAGTTGCTGCT 360
P               AGCTATGACTATTACAGACGGGGCATTCTCAACCTCAAACACCTAAGGGAGTTGCTGCT 360
                *****

GU936189.1      GGAAGACAACCAGTTACAAGAAATACCGGCTGGTTTGCCAGAATCTTTGAAAGAACTTAG 420
H               GGAAGACAACCAGTTACAAGAAATACCGGCTGGTTTGCCAGAATCTTTGAAAGAACTTAG 420
P               GGAAGACAACCAGTTACAAGAAATACCGGCTGGTTTGCCAGAATCTTTGAAAGAACTTAG 420
                *****

GU936189.1      TCTAATTCAAACAATATAATTACGTTAACGAAAAAGAACACTTCTGGACTTGGGAACCT 480
H               TCTAATTCAAACAATATAATTACGTTAACGAAAAAGAACACTTCTGGACTTGGGAACCT 480
P               TCTAATTCAAACAATATAATTACGTTAACGAAAAAGAACACTTCTGGACTTGGGAACCT 480
                *****

GU936189.1      GGAACGTCCTCTATTTGGGCTGGAAGTGTATTTTGTCTGTAGTAAAAAATTTAGCATAGA 540
H               GGAACGTCCTCTATTTGGGCTGGAAGTGTATTTTGTCTGTAGTAAAAAATTTAGCATAGA 540
P               GGAACGTCCTCTATTTGGGCTGGAAGTGTATTTTGTCTGTAGTAAAAAATTTAGCATAGA 540
                *****

GU936189.1      AAATGGAGCATTCCAAAACCTTACCAAGTTGAAGGTGCTGTGATTATCTTTAATCCCT 600
H               AAATGGAGCATTCCAAAACCTTACCAAGTTGAAGGTGCTGTGATTATCTTTAATCCCT 600
P               AAATGGAGCATTCCAAAACCTTACCAAGTTGAAGGTGCTGTGATTATCTTTAATCCCT 600
                *****

GU936189.1      TCACAGCGTGCCACCGAGTCTGCCAAGCTCGCTAACAGAACTCTACCTTAGCAATACCCA 660
H               TCACAGCGTGCCACCGAGTCTGCCAAGCTCGCTAACAGAACTCTACCTTAGCAATACCCA 660
P               TCACAGCGTGCCACCGAGTCTGCCAAGCTCGCTAACAGAACTCTACCTTAGCAATACCCA 660
                *****

GU936189.1      TATTGGAACGTCAGTGAAGAAGACTTCAAGGAAGTGAAGCAATTTAAGGGTACTAGATT 720
H               TATTGGAACGTCAGTGAAGAAGACTTCAAGGAAGTGAAGCAATTTAAGGGTACTAGATT 720
P               TATTGGAACGTCAGTGAAGAAGACTTCAAGGAAGTGAAGCAATTTAAGGGTACTAGATT 720
                *****

GU936189.1      AAGTGGAAACTGCCCGAGATGTTTTAACGCTCCGTTTCCCTGTGTACCTTGCCAAGGAGG 780
H               AAGTGGAAACTGCCCGAGATGTTTTAACGCTCCGTTTCCCTGTGTACCTTGCCAAGGAGG 780
P               AAGTGGAAACTGCCCGAGATGTTTTAACGCTCCGTTTCCCTGTGTACCTTGCCAAGGAGG 780
                *****

GU936189.1      TGCTTCAATTCAGATACAC      799
H               TGCTTCAATTCAGATACAC      799
P               TGCTTCAATTCAGATACAC      799
                *****

```

Figure S8: Comparison of healthy and pneumonia-affected Baladi goats using GenBank-sourced reference sequence gb|GU936189.1| and the *TLR8* gene (799-bp) demonstrating DNA sequence alignment.

```

EU747825.1    ATGGGCCCCCTACTGTGCCCCGCACCCCTTTCTCTTCTGGTGCAGGCAGCGCGCTGGCA 60
H             ATGGGCCCCCTACTGTGCCCCGCACCCCTTTCTCTTCTGGTGCAGGCAGCGCGCTGGCA 60
P             ATGGGCCCCCTACTGTGCCCCGCACCCCTTTCTCTTCTGGTGCAGGCAGCGCGCTGGCA 60
              *****

EU747825.1    GCAGCCCTGGCCCAGGGCACCCCTGCCTGCCTTCCTGCCCTGTGAGCTCCAGCCCCGGGGT 120
H             GCAGCCCTGGCCCAGGGCACCCCTGCCTGCCTTCCTGCCCTGTGAGCTCCAGCCCCGGGGT 120
P             GCAGCCCTGGCCCAGGGCACCCCTGCCTGCCTTCCTGCCCTGTGAGCTCCAGCCCCGGGGT 120
              *****

EU747825.1    CAGGTGAAGTGCAGTGGCTGTTCTGAAGTCTGTGCCGCGCTTTTCGGCCGGAGCCCCC 180
H             CAGGTGAAGTGCAGTGGCTGTTCTGAAGTCTGTGCCGCGCTTTTCGGCCGGAGCCCCC 180
P             CAGGTGAAGTGCAGTGGCTGTTCTGAAGTCTGTGCCGCGCTTTTCGGCCGGAGCCCCC 180
              *****

EU747825.1    CGGGCCAATGTCAACAGCCTCTCCTTAATCTCCAACCGCATCCACCACTTGACGACTCT 240
H             CGGGCCAATGTCAACAGCCTCTCCTTAATCTCCAACCGCATCCACCACTTGACGACTCT 240
P             CGGGCCAATGTCAACAGCCTCTCCTTAATCTCCAACCGCATCCACCACTTGACGACTCT 240
              *****

EU747825.1    GACTTCGTCCACCTGTCCAACCTGCGGGTCTCAACCTCAAGTGGAACTGCCCGCCGGCC 300
H             GACTTCGTCCACCTGTCCAACCTGCGGGTCTCAACCTCAAGTGGAACTGCCCGCCGGCC 300
P             GACTTCGTCCACCTGTCCAACCTGCGGGTCTCAACCTCAAGTGGAACTGCCCGCCGGCC 300
              *****

EU747825.1    GGCCTCAGCCCCATGCACTTCCCTGCGCATGACCAATTGAGCCCAACACCTTCCTGGCC 360
H             GGCCTCAGCCCCATGCACTTCCCTGCGCATGACCAATTGAGCCCAACACCTTCCTGGCC 360
P             GGCCTCAGCCCCATGCACTTCCCTGCGCATGACCAATTGAGCCCAACACCTTCCTGGCT 360
              *****

EU747825.1    GTGCCACCCCTGGAGGAGCTGAACCTGAGCTACAATGGCATCACGACCGTGCCCTG 420
H             GTGCCACCCCTGGAGGAGCTGAACCTGAGCTACAATGGCATCACGACCGTGCCCTG 420
P             GTGCCACCCCTGGAGGAGCTGAACCTGAGCTACAATGGCATCACGACCGTGCCCTG 420
              *****

EU747825.1    CCCAGTTCTCTCGTATCCCTGTGCTGAGCCGCACCAGCA 460
H             CCCAGTTCTCTCGTATCCCTGTGCTGAGCCGCACCAGCA 460
P             CCCAGTTCTCTCGTATCCCTGTGCTGAGCCGCACCAGCA 460
              *****

```

Figure S9: Comparison of healthy and pneumonia-affected Baladi goats using GenBank-sourced reference sequence gb|EU747825.1| and the *TLR9* gene (460-bp) demonstrating DNA sequence alignment.

|            |                                                                  |     |
|------------|------------------------------------------------------------------|-----|
| DQ532360.1 | CAGCATGAGGCTCCATCACCTGCTCCTCGCGCTCTTCTTCCTGGTCCTGTCTGCTGGGTC 60  |     |
| H          | CAGCATGAGGCTCCATCACCTGCTCCTCGCGCTCTTCTTCCTGGTCCTGTCTGCTGGGTC 60  |     |
| P          | CAGCATGAGGCTCCATCACCTGCTCCTCGTGTCTTCTTCCTGGTCCTGTCTGCTGGGTC 60   |     |
|            | *****                                                            |     |
| DQ532360.1 | AGGATTTACTCAAGGAATAATAAATCATCGAAGCTGCCATAGGATTAAAGGCGTCTGTGC 120 |     |
| H          | AGGATTTACTCAAGGAATAATAAATCATCGAAGCTGCCATAGGATTAAAGGCGTCTGTGC 120 |     |
| P          | AGGATTTACTCAAGGAATAATAAATCATCGAAGCTGCCATAGGATTAAAGGCGTCTGTGC 120 |     |
|            | *****                                                            |     |
| DQ532360.1 | GCCGGACAGGTGCCCTAGAAACATGAGACAGATTGGCACCTGTTTCGGGCCCCCAGTAAA 180 |     |
| H          | GCCGGACAGGTGCCCTAGAAACATGAGACAGATTGGCACCTGTTTCGGGCCCCCAGTAAA 180 |     |
| P          | GCCGGACAGGTGCCCTAGAAACATGAGACAGATTGGCACCTGTTTCGGGCCCCCAGTAAA 180 |     |
|            | *****                                                            |     |
| DQ532360.1 | ATGCTGCAGAAAGAGTAACAGAAAGCGAAGACGCGCGCGGACCGATGCGGAGTCAGAA 240   |     |
| H          | ATGCTGCAGAAAGAGTAACAGAAAGCGAAGACGCGCGCGGACCGATGCGGAGTCAGAA 240   |     |
| P          | ATGCTGCAGAAAGAGTAACAGAAAGCGAAGACGCGCGCGGACTGATGCGGAGTCAGAA 240   |     |
|            | *****                                                            |     |
| DQ532360.1 | ACTGCCGCCTTCG                                                    | 253 |
| H          | ACTGCCGCCTTCG                                                    | 253 |
| P          | ACTGCCGCCTTCG                                                    | 253 |
|            | *****                                                            |     |

Figure S10: Comparison of healthy and pneumonia-affected Baladi goats using GenBank-sourced reference sequence gb|DQ532360.1| and the  $\beta$  defensin gene (253-bp) demonstrating DNA sequence alignment.

|                |                                                               |     |
|----------------|---------------------------------------------------------------|-----|
| XM_013973239.2 | TCCTGTTTTGCCCACTGGTATCTCTCTGCCCTTTTCTCAGTCTCCCAGGAGCCACCCAG   | 60  |
| H              | TCCTGTTTTGCCCACTGGTATCTCTCTGCCCTTTTCTCAGTCTCCCAGGAGCCACCCAG   | 60  |
| P              | TCCTGTTTTGCCCACTGGTATCTCTCTGCCCTTTTCTCAGTCTCCCAGGAGCCACCCAG   | 60  |
|                | *****                                                         |     |
| XM_013973239.2 | AACAGCCCCTGGATCTGGAAGGGGACACGAACACCTAGTCATCTCAGCATCCAGGAAAGC  | 120 |
| H              | AACAGCCCCTGGATCTGGAAGGGGACACGAACACCTAGTCATCTCAGCATCCAGGAAAGC  | 120 |
| P              | AACAGCCCCTGGATCTGGAAGGGGACACGAACACCTAGTCATCTCAGCATCCAGGAAAGC  | 120 |
|                | * *****                                                       |     |
| XM_013973239.2 | CACCATGACCAGGGCCTTGGAGAGGCTCTTCTTCAGCACTTCATACATCAGAAGCTGGA   | 180 |
| H              | CACCATGACCAGGGCCTTGGAGAGGCTCTTCTTCAGCACTTCATACATCAGAAGCTGGA   | 180 |
| P              | CACCATGACCAGGGCCTTGGAGAGGCTCTTCTTCAGCACTTCATACATCAGAAGCTGGA   | 180 |
|                | *****                                                         |     |
| XM_013973239.2 | GATCGCTTATGCCATCAACAAGCCATTTCCCTTCTTCGAAGGCCTCCGAGACAACCTCTT  | 240 |
| H              | GATTGCTTATGCCATCAACAAGCCATTTCCCTTCTTCGAAGGCCTCCGAGACAACCTCTT  | 240 |
| P              | GATCGCTTATGCCATCAACAAGCCATTTCCCTTCTTCGAAGGCCTCCGAGACAACCTCTT  | 240 |
|                | *** *****                                                     |     |
| XM_013973239.2 | CATCACGGAGAGACTGTACAGGGAATCTATGGAAGCCTGGGAAAATCTGGTCCCTTTATG  | 300 |
| H              | CATCACGGAGAGACTGTACAGGGAATCTATGGAAGCCTGGGAAAATCTGGTCCCTTTATG  | 300 |
| P              | CATCACGGAGAGACTGTACAGGGAATCTATGGAAGCCTGGGAAAATCTGGTCCCTTTATG  | 300 |
|                | *****                                                         |     |
| XM_013973239.2 | CAGAGTTGTGTACAACATTCTTACCCAACCTGGAGAAGACATTTAGTCTATCATTTCTGAA | 360 |
| H              | CAGAGTTGTGTACAACATTCTTACCCAACCTGGAGAAGACATTTAGTCTATCATTTCTGAA | 360 |
| P              | CAGAGTTGTGTACAACATTCTTACCCAACCTGGAGAAGACATTTAGTCTATCATTTCTGAA | 360 |
|                | *****                                                         |     |
| XM_013973239.2 | GATATTGTTACGCCGAATTAACCTGAAAGCATAACCCCAACCTGATAACGGCTCTCAGTAG | 420 |
| H              | GATATTGTTACGCCGAATTAACCTGAAAGCATAACCCCAACCTGATAACGGCTCTCAGTAG | 420 |
| P              | GATATTGTTACGCCGAATTAACCTGAAAGCATAACCCCAACCTGATAACGGCTCTCAGTAG | 420 |
|                | *****                                                         |     |
| XM_013973239.2 | CTTCACAAGAGTCGTCACTTCCCATGGAGGCTGGAGCAGAAACACAACCATCCCTCTTGA  | 480 |
| H              | CTTCACAAGAGTCGTCACTTCCCATGGAGGCTGGAGCAGAAACACAACCATCCCTCTTGA  | 480 |
| P              | CTTCACAAGAGTCGTCACTTCCCATGGAGGCTGGAGCAGAAACACAACCATCCCTCTTGA  | 480 |
|                | *****                                                         |     |
| XM_013973239.2 | AGCCCCAGCCAACCCAGCAGGAAAGAGCTCCTCGAGGACCCTGCTATTGCCGTGTCT     | 537 |
| H              | AGCCCCAGCCAACCCAGCAGGAAAGAGCTCCTCGAGGACCCTGCTATTGCCGTGTCT     | 537 |
| P              | AGCCCCAGCCAACCCAGCAGGAAAGAGCTCCTCGAGGACCCTGCTATTGCCGTGTCT     | 537 |
|                | *****                                                         |     |

Figure S11: Comparison of healthy and pneumonia-affected Baladi goats using GenBank-sourced reference sequence gb|XM\_013973239.2| and the *SP110* gene (537-bp) demonstrating DNA sequence alignment.

Figure S12: Comparison of healthy and pneumonia-affected Baladi goats using GenBank-sourced reference sequence gb|NM\_001285667.1| and the *SPP1* gene (943-bp) demonstrating DNA sequence alignment.

```

KC894598.1      ATGGCCAGCGGCCCGGCGAGTGTGCGGAGGTGGGCAACCCCTGGTGGTGCTGGTCGCCCTG 60
H              ATGGCCAGCGGCCCGGCGAGTGTGCGGAGGTGGGCAACCCCTGGTGGTGCTGGTCGCCCTG 60
P              ATGGCCAGCGGCCCGGCGAGTGTGCGGAGGTGGGCAACCCCTGGTGGTGCTGGTCGCCCTG 60
*****
KC894598.1      GGCACGGCTGTGACAACGACGACCAACCCCGGCATCGTGGCCAGGGTCACCCAGAAAGGC 120
H              GGCACGGCTGTGACGACGACGACCAACCCCGGCATCGTGGCCAGGGTCACCCAGAAAGGC 120
P              GGCACGGCTGTGACAACGACGACCAACCCCGGCATCGTGGCCAGGGTCACCCAGAAAGGC 120
*****
KC894598.1      CTGGACTACGCCTGCCAGCAGGGAGTGCTTACTCTGCAGAAAGAGTTGGAGAAGATAACA 180
H              CTGGACTACGCCTGCCAGCAGGGAGTGCTTACTCTGCAGAAAGAGTTGGAGAAGATAACA 180
P              CTGGACTACGCCTGCCAGCAGGGAGTGCTTACTCTGCAGAAAGAGTTGGAGAAGATAACA 180
*****
KC894598.1      ATTCCCACTTTCTCAGGAACTTTAAGATAAAATACCTCGGGAAGGGCAATACAGCTTC 240
H              ATTCCCACTTTCTCAGGAACTTTAAGATAAAATACCTCGGGAAGGGCAATACAGCTTC 240
P              ATTCCCACTTTCTCAGGAACTTTAAGATAAAATACCTCGGGAAGGGCAATACAGCTTC 240
*****
KC894598.1      TTCAGCATGGTTATTTCGAGGATTCAATCTTCCCAATTCCAGATCAGACCGTTGCCGGAT 300
H              TTCAGCATGGTTATTTCAGGATTCAATCTTCCCAATTCCAGATCAGACCGTTGCCGGAT 300
P              TTCAGCATGGTTATTTCGAGGATTCAATCTTCCCAATTCCAGATCAGACCGTTGCCGGAT 300
*****
KC894598.1      GAGGGCCTTGATCTCTCTATCAGAGATGCCAGTATCAAGATCAGAGGAAAATGGAAGGCA 360
H              GAGGGCCTTGATCTCTCTATCAGAGATGCCAGTATCAAGATCAGAGGAAAATGGAAGGCA 360
P              GAGGGCCTTGATCTCTCTATCAGAGATGCCAGTATCAAGATCAGAGGAAAATGGAAGGCA 360
*****
KC894598.1      CGAAGAAGTTCATCAAACCTCGGCGGCAACTTTGACCTGAGTGTGGAGGGCATCTCTATT 420
H              CGAAGAAGTTCATCAAACCTCGGCGGCAACTTTGACCTGAGTGTGGAGGGCATCTCTATT 420
P              CGAAGAAGTTCATCAAACCTCGGCGGCAACTTTGACCTGAGTGTGGAGGGCATCTCTATT 420
*****
KC894598.1      TCGGCGGGTCTGAGTCTGGGCTATGACCTGACTCAGGCCACTCCACTGTTACCTGCCCC 480
H              TCGGCGGGTCTGAGTCTGGGCTATGACCTGACTCAGGCCACTCCACTGTTACCTGCCCC 480
P              TCGGCGGGTCTGAGTCTGGGCTATGACCTGACTCAGGCCACTCCACTGTTACCTGCCCC 480
*****
KC894598.1      AGATGCAGCAGCCACATCAACACCGTCCGCATACGCATCTCTGGCAGCAGCGTGGGGTGG 540
H              AGATGCAGCAGCCACATCAACACCGTCCGCATACGCATCTCTGGCAGCAGCGTGGGGTGG 540
P              AGATGCAGCAGCCACATCAACACCGTCCGCATACGCATCTCTGGCAGCAGCGTGGGGTGG 540
*****
KC894598.1      TTGATCCAACCTCTCCACAAAAGAAATCGAGTCTTCGCTCCAAAACCTCCATGACCAGCAAG 600
H              TTGATCCAACCTCTCCACAAAAGAAATCGAGTCTTCGCTCCAAAACCTCCATGACCAGCAAG 600
P              TTGATCCAACCTCTCCACAAAAGAAATCGAGTCTTCGCTCCAAAACCTCCATGACCAGCAAG 600
*****
KC894598.1      ATCTGCGAGGTGGTGACTAGTACTGTGTCTTCCAAGCTGCAACCT      645
H              ATCTGCGAGGTGGTGACTAGTACTGTGTCTTCCAAGCTGCAACCT      645
P              ATCTGCGAGGTGGTGACTAGTACTGTGTCTTCCAAGCTGCAACCT      645
*****

```

Figure S13: Comparison of healthy and pneumonia-affected Baladi goats using GenBank-sourced reference sequence gb|KC894598.1| and the *BP1* gene (645-bp) demonstrating DNA sequence alignment.



|                |                                                              |     |
|----------------|--------------------------------------------------------------|-----|
| XM_018048527.1 | AACCGCAATACATGGTGCTGGTCCCTCCCTGCTCCGTACCAGAATCCCTGAGAAGGGTT  | 60  |
| H              | AACCGCAATACATGGTGCTGGTCCCTCCCTGCTCCGTACCAGAATCCCTGAGAAGGGTT  | 60  |
| P              | AACCGCAATACATGGTGCTGGTCCCTCCCTGCTCCGTACCAGAATCCCTGAGAAGGGTT  | 60  |
|                | *****                                                        |     |
| XM_018048527.1 | GCCTCCTTCTGAGCCACCTGAATGAGACGGTGACTGTCAGCGCCTCCTTGGAGTCCGTCA | 120 |
| H              | GCCTCCTTCTGAGCCACCTGAATGAGACGGTGACTGTCAGCGCCTCCTTGGAGTCCGTCA | 120 |
| P              | GCCTCCTTCTGAGCCACCTGAATGAGACGGTGACTGTCAGCGCCTCCTTGGAGTCCGTCA | 120 |
|                | *****                                                        |     |
| XM_018048527.1 | GAGAGAACAGGAGCCTCTTCACTGATGTGGTGGCAGAGAAGGACTTATTCCACTGTGTCT | 180 |
| H              | GAGAGAACAGGAGCCTCTTCACTGATGTGGTGGCAGAGAAGGACTTATTCCACTGTGTCT | 180 |
| P              | GAGAGAACAGGAGCCTCTTCACTGATGTGGTGGCAGAGAAGGACTTATTCCACTGTGTCT | 180 |
|                | *****                                                        |     |
| XM_018048527.1 | CCTTCAGCCTCCCAAGATCTCCAACCAAGTCAAGAGGTAATGTTCCACCATCCAAGTTA  | 240 |
| H              | CCTTCAGCCTCCCAAGATCTCCAACCAAGTCAAGAGGTAATGTTCCACCATCCAAGTTA  | 240 |
| P              | CCTTCAGCCTCCCAAGATCTCCAACCAAGTCAAGAGGTAATGTTCCACCATCCAAGTTA  | 240 |
|                | *****                                                        |     |
| XM_018048527.1 | AAGGACCAACCCAGAATTCAAGAAGCGGACCACAGTGTTGGTTAAAAATGAAGAGAGCC  | 300 |
| H              | AAGGACCAACCCAGAATTCAAGAAGCGGACCACAGTGTTGGTTAAAAATGAAGAGAGCC  | 300 |
| P              | AAGGACCAACCCAGAATTCAAGAAGCGGACCACAGTGTTGGTTAAAAATGAAGAGAGCC  | 300 |
|                | *****                                                        |     |
| XM_018048527.1 | TGGTCTTTGTCCAGACAGACAAACC                                    | 325 |
| H              | TGGTCTTTGTCCAGACAGACAAACC                                    | 325 |
| P              | TGGTCTTTGTCCAGACAGACAAACC                                    | 325 |
|                | *****                                                        |     |

Figure S14: Comparison of healthy and pneumonia-affected Baladi goats using GenBank-sourced reference sequence gb|XM\_018048527.1| and the *A2M* gene (325-bp) demonstrating DNA sequence alignment.

|                |                                                              |     |
|----------------|--------------------------------------------------------------|-----|
| XM_013962543.2 | CTACTCACCTGGGAAGCTTCTCCTGGAAAACGAGATGCCTGTCAACAGCACTGCCGTGTC | 60  |
| H              | CTACTCACCTGGGAAGCTTCTCCTGGAAAACGAGATGCCTGTCAACAGCACTGCCGTGTC | 60  |
| P              | CTACTCACCTGGGAAGCTTCTCCTGGAAAACGAGATGCCTGTCAACAGCACTGCCGTGTC | 60  |
|                | *****                                                        |     |
| XM_013962543.2 | CTTGACCAGTGTACCTACATCACTGTGGAGATCCTCATCGGGCTCTGCGCCATAGTGGG  | 120 |
| H              | CTTGACCAGTGTACCTACATCACTGTGGAGATCCTCATCGGGCTCTGCGCCATAGTGGG  | 120 |
| P              | CTTGACCAGTGTACCTACATCACTGTGGAGATCCTCATCGGGCTCTGCGCCATAGTGGG  | 120 |
|                | *****                                                        |     |
| XM_013962543.2 | CAACGTGCTGGTCATCTGGGTGGTCAAGCTGAACCCAGCCTGCAGACCACCACCTTCTA  | 180 |
| H              | CAACGTGCTGGTCATCTGGGTGGTCAAGCTGAACCCAGCCTGCAGACCACCACCTTCTA  | 180 |
| P              | CAACGTGCTGGTCATCTGGGTGGTCAAGCTGAACCCAGCCTGCAGACCACCACCTTCTA  | 180 |
|                | *****                                                        |     |
| XM_013962543.2 | TTTCATTGTCTCCCTAGCCCTGGCTGACATTGCTGTGCGGGTGTGGTTATGCCTCTGGC  | 240 |
| H              | TTTCATTGTCTCCCTAGCCCTGGCTGACATTGCTGTGCGGGTGTGGTTATGCCTCTGGC  | 240 |
| P              | TTTCATTGTCTCCCTAGCCCTGGCTGACATTGCTGTGCGGGTGTGGTTATGCCTCTGGC  | 240 |
|                | *****                                                        |     |
| XM_013962543.2 | CATTGTCAICAGCCTGGGTGTCACAATCCACTTTTATAGCTGCCTTTTCATGACCTGCTT | 300 |
| H              | CATTGTCAICAGCCTGGGTGTCACAATCCACTTTTATAGCTGCCTTTTCATGACCTGCTT | 300 |
| P              | CATTGTCAICAGCCTGGGTGTCACAATCCACTTTTATAGCTGCCTTTTCATGACCTGCTT | 300 |
|                | *****                                                        |     |
| XM_013962543.2 | GATGCTGAICTTCACCCACGCATCCATCATGTCTTGTAGCCATTGCTGTGGACCGATA   | 360 |
| H              | GATGCTGAICTTCACCCACGCATCCATCATGTCTTGTAGCCATTGCTGTGGACCGATA   | 360 |
| P              | GATGCTGAICTTCACCCACGCATCCATCATGTCTTGTAGCCATTGCTGTGGACCGATA   | 360 |
|                | *****                                                        |     |
| XM_013962543.2 | CCTGCGGGTCAAGCTCACAGTCAGATCCAGGATTCTTAAGGCCCTGGGTCCATCTGGTC  | 420 |
| H              | CCTGCGGGTCAAGCTCACAGTCAGATCCAGGATTCTTAAGGCCCTGGGTCCATCTGGTC  | 420 |
| P              | CCTGCGGGTCAAGCTCACAGTCAGATCCAGGATTCTTAAGGCCCTGGGTCCATCTGGTC  | 420 |
|                | *****                                                        |     |
| XM_013962543.2 | ATCCAGTTGAAGATTCACTTCTTTCCAGTCATGAGGCTCTTCATTCTGCTCTCTTTGAC  | 480 |
| H              | ATCCAGTTGAAGATTCACTTCTTTCCAGTCATGAGGCTCTTCATTCTGCTCTCTTTGAC  | 480 |
| P              | ATCCAGTTGAAGATTCACTTCTTTCCAGTCATGAGGCTCTTCATTCTGCTCTCTTTGAC  | 480 |
|                | *****                                                        |     |
| XM_013962543.2 | TGTCTTTTCAGATGCCATGGTCATGGACGAGAAGGTCAAGG                    | 521 |
| H              | TGTCTTTTCAGATGCCATGGTCATGGACGAGAAGGTCAAGG                    | 521 |
| P              | TGTCTTTTCAGATGCCATGGTCATGGACGAGAAGGTCAAGG                    | 521 |
|                | *****                                                        |     |

Figure S15: Comparison of healthy and pneumonia-affected Baladi goats using GenBank-sourced reference sequence gb|XM\_013962543.2| and the *ADORA3* gene (521-bp) demonstrating DNA sequence alignment.

|            |                                                                   |
|------------|-------------------------------------------------------------------|
| KJ001638.1 | ATGTGCGCACAAAGATGCTTTTCAGACACAGAGAAGCCAGCTGGTGGAGTTGCTGGTCTCG 60  |
| H          | ATGTGCGCACAAAGATGCTTTTCAGACACAGAGAAGCCAGCTGGTGGAGTTGCTGGTCTCG 60  |
| P          | ATGTGCGCACAAAGATGCTTTTCAGACACAGAGAAGCCAGCTGGTGGAGTTGCTGGTCTCG 60  |
|            | *****                                                             |
| KJ001638.1 | GGGTCCCTGGAGAGCTTTGAGAGTATTGTGGACCGGCTGCTTTCCCGGGAAGTCCTCTCC 120  |
| H          | GGGTCCCTGGAGAGCTTTGAGAGTATTGTGGACCGGCTGCTTTCCCGGGAAGTCCTCTCC 120  |
| P          | GGGTCCCTGGAGAGCTTTGAGAGTATTGTGGACCGGCTGCTTTCCCGGGAAGTCCTCTCC 120  |
|            | *****                                                             |
| KJ001638.1 | TGGGAGGACTATGAGGGGCTTAGCCTCGTGGGCCAGCCCATCTCCCACTTGGCCAGGCGC 180  |
| H          | TGGGAGGACTATGAGGGGCTTAGCCTCGTGGGCCAGCCCATCTCCCACTTGGCCAGGCGC 180  |
| P          | TGGGAGGACTATGAGGGGCTTAGCCTCGTGGGCCAGCCCATCTCCCACTTGGCCAGGCGC 180  |
|            | *****                                                             |
| KJ001638.1 | CTCCTGGACACCATCTGGAATAAGGGTGCTTGGGGCTGTGAACAACCTGACTGCAGCTGTG 240 |
| H          | CTCCTGGACACCATCTGGAATAAGGGTGCTTGGGGCTGTGAACAACCTGACTGCAGCTGTG 240 |
| P          | CTCCTGGACACCATCTGGAATAAGGGTGCTTGGGGCTGTGAACAACCTGACTGCAGCTGTG 240 |
|            | *****                                                             |
| KJ001638.1 | TGGGAGGCCAGGCCGACAGCCAGCCCCCGAGCTTCCCAGCTCCTGGGACCCCCACTCA 300    |
| H          | TGGGAGGCCAGGCCGACAGCCAGCCCCCGAGCTTCCCAGCTCCTGGGACCCCCACTCA 300    |
| P          | TGGGAGGCCAGGCCGACAGCCAGCCCCCGAGCTTCCCAGCTCCTGGGACCCCCACTCA 300    |
|            | *****                                                             |
| KJ001638.1 | CCCCACCCAGCCCGTGACCTGCAGAGTCATCGGCCAGCCATCGTCAGGAGACTCTACGGC 360  |
| H          | CCCCACCCAGCCCGTGACCTGCAGAGTCATCGGCCAGCCATCGTCAGGAGACTCTACGGC 360  |
| P          | CCCCACCCAGCCCGTGACCTGCAGAGTCATCGGCCAGCCATCGTCAGGAGACTCTACGGC 360  |
|            | *****                                                             |
| KJ001638.1 | CACGTGGAGGGTGTGCTGGACCTGACACAGCAGC 394                            |
| H          | CACGTGGAGGGTGTGCTGGACCTGACACAGCAGC 394                            |
| P          | CACGTGGAGGGTGTGCTGGACCTGACACAGCAGC 394                            |
|            | *****                                                             |

Figure S16: Comparison of healthy and pneumonia-affected Baladi goats using GenBank-sourced reference sequence gb|KJ001638.1| and the *CARD15* gene (394-bp) demonstrating DNA sequence alignment.

```

JQ308793.1      ACTCCTGGGAAGGATAAGCCCGACCTGCCCCACATGGAAGAGGAATTTCCGGTCTGCCCTG 60
H              ACTCCTGGGAAGGATAAGCCCGACCTGCCCCACATGGAAGAGGAATTTCCGGTCTGCCCTG 60
P              ACTCCTGGGAAGGATAAGCCCGACCTGCCCCACATGGAAGAGGAATTTCCGGTCTGCCCTG 60
*****
JQ308793.1      AACCGGAAGGAAGTGTTGCGTTTAGCGGAGGACCACAGCAAGGACTCCCAAGACCCGCAC 120
H              AACCGGAAGGAAGTGTTGCGTTTAGCGGAGGACCACAGCAAGGACTCCCAAGACCCGCAC 120
P              AACCGGAAGGAAGTGTTGCGTTTAGCGGAGGACCACAGCAAGGACTCCCAAGACCCGCAC 120
*****
JQ308793.1      AAGATCTATGAGTTTGTGAACTCAGGGGTCAGGGACATCCCTGAGACAGATAACCGCTCAA 180
H              AAGATCTATGAGTTTGTGAACTCAGGGGTCAGGGACATCCCTGAGACAGATAACCGCTCAA 180
P              AAGATCTATGAGTTTGTGAACTCAGGGGTCAGGGACATCCCTGAGACAGATAACCGCTCAA 180
*****
JQ308793.1      GACAAATGGCAGACACAGTACCTCTGATACCCAGGAAGACATTGTGCAGAAGTTACTGAGT 240
H              GACAAATGGCAGACACAGTACCTCTGATACCCAGGAAGACATTGTGCAGAAGTTACTGAGT 240
P              GACAAATGGCAGACACAGTACCTCTGATACCCAGGAAGACATTGTGCAGAAGTTACTGAGT 240
*****
JQ308793.1      GACATGGACTTGAGCCCAGAAGGAGGGCCCTCCAATCTGACTATGACCTCTGAGAACCCC 300
H              GACATGGACTTGAGCCCAGAAGGAGGGCCCTCCAATCTGACTATGACCTCTGAGAACCCC 300
P              GACATGGACTTGAGCCCAGAAGGAGGGCCCTCCAATCTGACTATGACCTCTGAGAACCCC 300
*****
JQ308793.1      CCTCAGCTCTTACTGAGCCCCGAATCAGACATCCCTGCTCTTTGCCCAAACCTCGGGACTC 360
H              CCTCAGCTCTTACTGAGCCCCGAATCAGACATCCCTGCTCTTTGCCCAAACCTCGGGACTC 360
P              CCTCAGCTCTTACTGAGCCCCGAATCAGACATCCCTGCTCTTTGCCCAAACCTCGGGACTC 360
*****
JQ308793.1      TCTGAAAACCCCTGAAGCAGCTGTTGGCGAACGAGGAAGATTGGGAGTTCGAGGTGACT 420
H              TCTGAAAACCCCTGAAGCAGCTGTTGGCGAACGAGGAAGATTGGGAGTTCGAGGTGACT 420
P              TCTGAAAACCCCTGAAGCAGCTGTTGGCGAACGAGGAAGATTGGGAGTTCGAGGTGACT 420
*****
JQ308793.1      GCCTTCTACCGGGGCTGTCAAGTCTTCCAGCAGACTGTCTTCTGCCCT      468
H              GCCTTCTACCGGGGCTGTCAAGTCTTCCAGCAGACTGTCTTCTGCCCT      468
P              GCCTTCTACCGGGGCTGTCAAGTCTTCCAGCAGACTGTCTTCTGCCCT      468
*****

```

Figure S17: Comparison of healthy and pneumonia-affected Baladi goats using GenBank-sourced reference sequence gb|JQ308793.1| and the *IRF3* gene (468-bp) demonstrating DNA sequence alignment.

|                |                                                              |     |
|----------------|--------------------------------------------------------------|-----|
| XR_001917340.1 | CTGAGATCAGGAATGTGAACGGGGTGGACCGCCTCTGTGGCCTGCACCGGGAGGAGGCCA | 60  |
| H              | CTGAGATCAGGAATGTGAACGGGGTGGACCGCCTCTGTGGCCTGCACCGGGAGGAGGCCA | 60  |
| P              | CTGAGATCAGGAATGTGAACGGGGTGGACCGCCTCTGTGGCCTGCACCGGGAGGAGGCCA | 60  |
|                | *****                                                        |     |
| XR_001917340.1 | CGGTGTTCTGCCAGGAGCTGGGGTGAGGCCCTGCCCTGCAGGTCCCCGCCAAGATGGCA  | 120 |
| H              | CGGTGTTCTGCCAGGAGCTGGGGTGAGGCCCTGCCCTGCAGGTCCCCGCCAAGATGGCA  | 120 |
| P              | CGGTGTTCTGCCAGGAGCTGGGGTGAGGCCCTGCCCTGCAGGTCCCCGCCAAGATGGCA  | 120 |
|                | *****                                                        |     |
| XR_001917340.1 | GTGTCACCAGGAAGTACATGACCTGTAGGGGCGACGAGCTGACCATCCGGAAGTGCAGAC | 180 |
| H              | GTGTCGCCAGGAAGTACATGACCTGTAGGGGCGACGAGCTGACCATCCGGAAGTGCAGAC | 180 |
| P              | GTGTCACCAGGAAGTACATGACCTGTAGGGGCGACGAGCTGACCATCCGGAAGTGCAGAC | 180 |
|                | *****                                                        |     |
| XR_001917340.1 | TGAACAAGTTCCGCAGCGGCTGCGACTTCCAGCGAGATGCCCAGGTGGTCTGCTCAGGGC | 240 |
| H              | TGAACAAGTTCCGCAGCGGCTGCGACTTCCAGCGAGATGCCCAGGTGGTCTGCTCAGGGC | 240 |
| P              | TGAACAAGTTCCGCAGCGGCTGCGACTTCCAGCGAGATGCCCAGGTGGTCTGCTCAGGGC | 240 |
|                | *****                                                        |     |
| XR_001917340.1 | ACACGGAGGCCCGGCTGGCGGGTGGCGGGCACTCCTGTGCTGGCGCGCTGGAGGTGAGGC | 300 |
| H              | ACACGGAGGCCCGGCTGGCGGGTGGCGGGCACTCCTGTGCTGGCGCGCTGGAGGTGAGGC | 300 |
| P              | ACACGGAGGCCCGGCTGGCGGGTGGCGGGCACTCCTGTGCTGGCGCGCTGGAGGTGAGGC | 300 |
|                | *****                                                        |     |
| XR_001917340.1 | GTGGCCTGACCTGGGGCACCCTCTGTGACGCTGACCTGGACCTGGCCACTGCCACGTTGG | 360 |
| H              | GTGGCCTGACCTGGGGCACCCTCTGTGACGCTGACCTGGACCTGGCCACTGCCACGTTGG | 360 |
| P              | GTGGCCTGACCTGGGGCACCCTCTGTGACGCTGACCTGGACCTGGCCACTGCCACGTTGG | 360 |
|                | *****                                                        |     |
| XR_001917340.1 | TGTGCCGGGAGCTGCAGTGTGGTGTGGCCGTGTCCACACCCAGGGCGGCCACTTTGGCC  | 420 |
| H              | TGTGCCGGGAGCTGCAGTGTGGTGTGGCCGTGTCCACACCCAGGGCGGCCACTTTGGCC  | 420 |
| P              | TGTGCCGGGAGCTGCAGTGTGGTGTGGCCGTGTCCACACCCAGGGCGGCCACTTTGGCC  | 420 |
|                | *****                                                        |     |
| XR_001917340.1 | AGGGCTCGGGGCTCGTGTGGACCGAGGCCCTTCCGCGGGCAACGAGTCCCTGCTGT     | 475 |
| H              | AGGGCTCGGGGCTCGTGTGGACCGAGGCCCTTCCGCGGGCAACGAGTCCCTGCTGT     | 475 |
| P              | AGGGCTCGGGGCTCGTGTGGACCGAGGCCCTTCCGCGGGCAACGAGTCCCTGCTGT     | 475 |
|                | *****                                                        |     |

Figure S18: Comparison of healthy and pneumonia-affected Baladi goats using GenBank-sourced reference sequence gb|XR\_001917340.1| and the *SCART1* gene (475-bp) demonstrating DNA sequence alignment.
